# Supplementary material for: Sulfur-doped carbon nanofibers as stable and high performance anode materials for sodium-ion batteries
Source: Royal Society of Chemistry journal article supplement (doi:10.1039/d4se00478g), 2024-01-01
Supplement: d4se00478g1.pdf [file d4se00478g1.pdf]

## **Supporting Information**

### **Sulfur doped carbon nanofiber as stable and high performance anode materials for sodium-ion batteries**

Mengwei Lu, Ying Huang\*, Xianping Du, Xitong Sheng

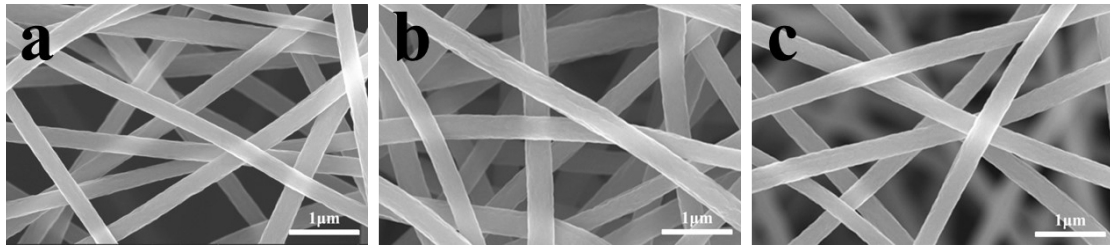

Fig.S1. SEM images of (a)CNF-0.5S, (b)CNF-1S and (c)CNF-3S.

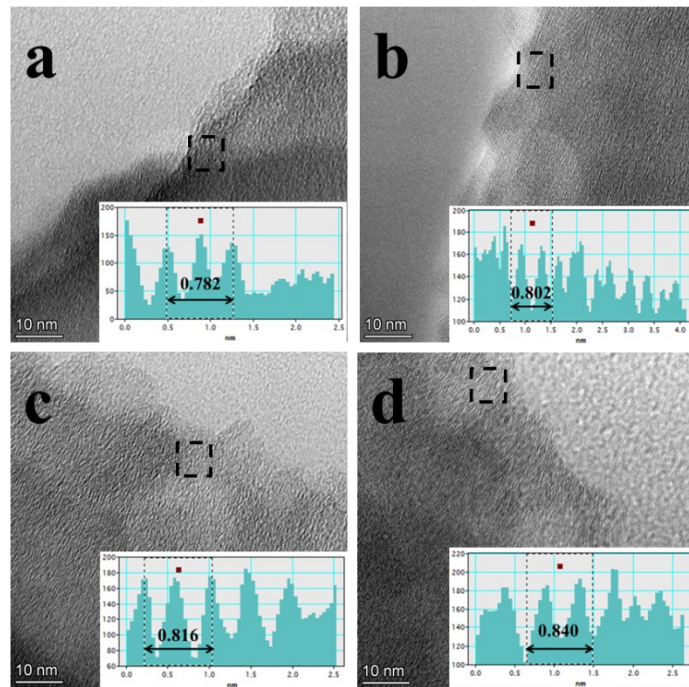

Fig.S2. TEM images of (a)CNF, (b)CNF-0.5S, (c)CNF-1S and (d)CNF-3S.

**Table S1.** Element content of CNF, CNF-0.5S, CNF-1S, CNF-2S and CNF-3S.

| Element content (%) | C     | N    | O     | S     |
|---------------------|-------|------|-------|-------|
| CNF                 | 78.02 | 5.12 | 16.86 |       |
| CNF-0.5S            | 74.9  | 5.1  | 11.1  | 8.9   |
| CNF-1S              | 72.75 | 5.07 | 11.75 | 10.43 |
| CNF-2S              | 72.82 | 4.3  | 10.15 | 12.71 |
| CNF-3S              | 71.85 | 4.16 | 10.9  | 13.09 |

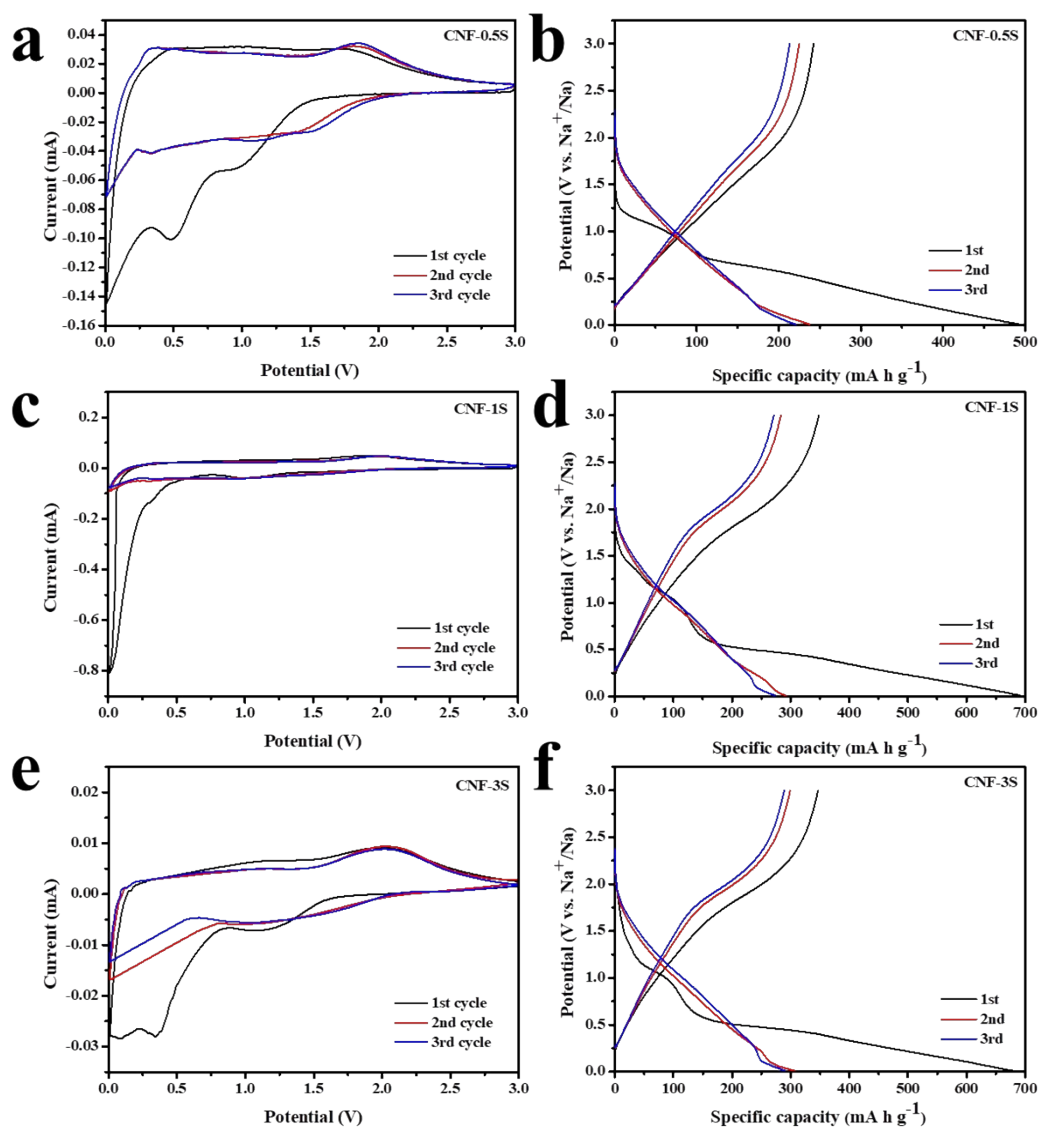

Fig.S3. CV curves of (a) CNF-0.5S, (c) CNF-1S and (e) CNF-3S at a scan rate of 0.1 mV/s; The charge/discharge curves of (b) CNF-0.5S, (d) CNF-1S and (f) CNF-3S at a current density of 0.1 A/g.

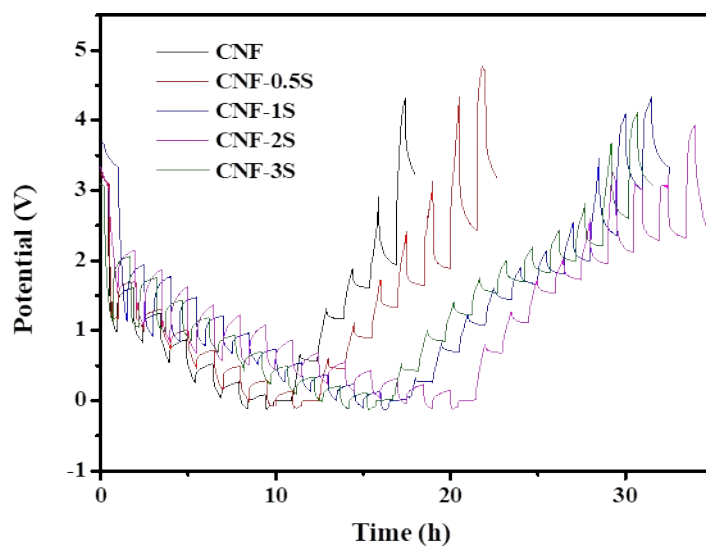

Fig.S4. GITT curves of (a)CNF, (b)CNF-0.5S, (c)CNF-1S, (c)CNF-2S and (d)CNF-3S.

**Table S2.** Comparison of the electrochemical performance of CNF-2S with those of reported carbonized anodic materials in SIBs

| Materials  | Cycling capacity<br>(mA h g <sup>-1</sup> /A g <sup>-1</sup> ) | Rate capability                             |           |
|------------|----------------------------------------------------------------|---------------------------------------------|-----------|
|            |                                                                | (mA h g <sup>-1</sup> /A g <sup>-1</sup> /n | Reference |
| NSPCNNs    | 336.2/0.05                                                     | 214.9/0.5/2000                              | [26]      |
| WSC-1000   | 305/0.1                                                        | 182/1/1500                                  | [27]      |
| S-Cmph-700 | 372.3/0.04                                                     | 145.6/2/500                                 | [30]      |
| CNT/SCNF   | 315.9/0.1                                                      | 100.1/5/5000                                | [49]      |
| SCNNF      | 290.3/0.1                                                      | 170.5/5/6000                                | [50]      |
| S-NCNF     | 251/0.2                                                        | 204/2/3000                                  | [51]      |
| S-NCNFs    | 336.2/0.05                                                     | 187/2/2000                                  | [52]      |
| CNF-2S     | 368.2/0.1                                                      | 122/10/1000                                 | This work |
